# Supplementary material
Source: Research Square preprint supplement (doi:10.21203/rs.3.rs-9281509/v1)
Supplement: Supplementary file 1 [file 547f6027c15241c11679003f.doc]

# Mass Spectrometry Report

| [M+2H]2+  [M+3H]3+  [M+4H]4+ | | | | | | | |
| --- | --- | --- | --- | --- | --- | --- | --- |
|  | Sample Description | | Instrument | Agilent-6125B | | | |
|  | Analyzed date: | 2024-08-06 | Probe: | ESI | | Probe Bias: | ＋4.5kv |
|  | Analyst: | YU | Nebulizer Gas Flow: | 1.5L/min | | Detector: | 1.5kv |
|  | Sample: | NOTA-LE-21 LE-21 | CDL: | -20.0v | | T. Flow: | 0.2ml/min |
|  | M.W.: | 2743.85 | CDL Temp.: | 250 | oC | B. Conc.: | 50%H2O/50%ACN |
|  | Lot. No.: | P240709-HS1182149 | Block Temp.: | 200 | oC |  |  |
